# Supplementary material for: Effectiveness and Tolerability of Micafungin in Chinese Patients with Invasive Fungal Infections: A Retrospective, Multicenter Study
Source: PubMed Central journal article supplement — Adv Ther. 2018 Aug 13;35(9):1400–10. doi: 10.1007/s12325-018-0762-5 (PMC6133133; doi:10.1007/s12325-018-0762-5), 2018-08-13

**Supplementary Table 1** Definitions of response categories

|                 |                   | <b>For patients who received micafungin as empirical antifungal therapy</b> | <b>For patients who received diagnostic driven antifungal therapy</b>                                                                                                                                                                                                                                                    | <b>For patients with invasive candidiasis and candidemia</b>                                                                                                                                                                                                                          | <b>For patients with invasive aspergillosis</b>                                                                                                                                      |
|-----------------|-------------------|-----------------------------------------------------------------------------|--------------------------------------------------------------------------------------------------------------------------------------------------------------------------------------------------------------------------------------------------------------------------------------------------------------------------|---------------------------------------------------------------------------------------------------------------------------------------------------------------------------------------------------------------------------------------------------------------------------------------|--------------------------------------------------------------------------------------------------------------------------------------------------------------------------------------|
| Overall Success | Complete response | Resolution of fever symptoms                                                | Survival within the observation period AND resolution of all attributable symptoms and signs of disease and radiological abnormalities AND<br><br>Survival within the observation period AND mycological evidence of eradication of disease                                                                              | Fungal clearance confirmed in the blood OR at the original infected site by a second biopsy/repeated biopsies<br><br>For patients whose samples are difficult to re-culture <sup>a</sup> , disappearance of all symptoms and signs of infection and imaging abnormalities is required | Disappearance of imaging abnormalities, or only a continuous scar or post-operative imaging change AND evidence of pathogen clearance at the site of infection by secondary culture  |
|                 | Partial response  | Improvement in fever symptoms                                               | Survival within the observation period AND improvement in attributable symptoms and signs of disease and radiological abnormalities AND<br><br>Survival within the observation period AND evidence of clearance of cultures or reduction of fungal burden, as assessed by a quantitative and validated laboratory marker | Fungal clearance confirmed in the blood OR at the original infected site by a second biopsy/repeated biopsies<br><br>For patients whose samples are difficult to re-culture <sup>a</sup> , disappearance of all symptoms and signs of infection and imaging abnormalities is required | Lesion diameter reduced by >25% AND<br><br>A second culture provides evidence of pathogen clearance at the site of infection<br><br>Relief of overall clinical symptoms and signs in |

patients with stable imaging<sup>b</sup>  
Stable imaging<sup>b</sup>, no mycelium  
and negative culture  
confirmed in biopsy of  
infected sites

---

|                        |                                                                                                                                                                                                     |
|------------------------|-----------------------------------------------------------------------------------------------------------------------------------------------------------------------------------------------------|
| Failure                | Patients with stable response, progression of disease and death                                                                                                                                     |
| Stable response        | Survival within the observation period and no improvement in fungal disease, but no evidence of progression, as determined based on a composite of clinical, radiological, and mycological criteria |
| Progression of disease | Evidence of progressive fungal disease based on a composite of clinical, radiological, and mycological criteria                                                                                     |
| Death                  | Death during the prespecified period of evaluation, regardless of attribution                                                                                                                       |

---

<sup>a</sup>e.g. patients with internal organ infections

<sup>b</sup>lesion diameter <25%

**Supplementary Table 2** Distribution of patients according to organism causing the infection, type of disease and the duration of treatment (PPS)

| <b>Index</b>                         | <b>(n = 2555)</b> |
|--------------------------------------|-------------------|
| PPS, n (%)                           | 1457 (57.0)       |
| Type of IFI, n (%)                   |                   |
| <i>Aspergillus</i> infected patients | 17 (1.2)          |
| <i>Candida</i> infected patients     | 217 (14.9)        |
| Not applicable                       | 1223 (83.9)       |
| Diseases, n (%)                      |                   |
| Gastrointestinal mycosis             | 11 (0.8)          |
| Fungemia                             | 34 (2.3)          |
| Respiratory mycosis                  | 642 (44.1)        |
| Not applicable                       | 770 (52.9)        |
| Duration of treatment, n (%)         |                   |
| ≥ 4 weeks                            | 100 (6.9)         |
| ≥ 2 weeks to < 4 weeks               | 508 (34.9)        |
| ≥ 1 week to < 2 weeks                | 849 (58.3)        |

*IFI*, invasive fungal infection; *PPS*, per-protocol set

**Supplementary Table 3** Rates of fever resolution, resolution of other signs and symptoms, and mycological evidence of pathogen clearance (FAS)

|                                            | <b>Number of patients (%)</b>   | <b>95% CI<sup>a</sup></b> |
|--------------------------------------------|---------------------------------|---------------------------|
| Resolution of fever symptoms               | ( <i>n</i> = 1403)              |                           |
| Not applicable                             | 17 (1.2)                        | 0.6–1.8                   |
| Fever symptoms not resolved                | 290 (20.7)                      | 18.7–22.8                 |
| Resolution of fever symptoms               | 1096 (78.1)                     | 76.0–80.3                 |
| Resolution of other signs and symptoms     | ( <i>n</i> = 2467)              |                           |
| Resolution                                 | 113 (4.6)                       | 3.8–5.4                   |
| Improvement                                | 1284 (52.1)                     | 50.1–54.0                 |
| No improvement                             | 436 (17.7)                      | 16.2–19.2                 |
| Deterioration                              | 284 (11.5)                      | 10.3–12.8                 |
| Not applicable                             | 350 (14.2)                      | 12.8–15.6                 |
| Resolution of imaging abnormalities        | ( <i>n</i> = 1314) <sup>b</sup> |                           |
| Disappeared                                | 9 (0.7)                         | 0.2–1.1                   |
| Improved                                   | 259 (19.7)                      | 17.6–21.9                 |
| Stabilized                                 | 124 (9.4)                       | 7.9–11.0                  |
| Aggravated                                 | 92 (7.0)                        | 5.6–8.4                   |
| New lesions                                | 18 (1.4)                        | 0.7–2.0                   |
| Uncertain radiographic findings            | 812 (61.8)                      | 59.2–64.4 <sup>c</sup>    |
| Mycological evidence of pathogen clearance | ( <i>n</i> = 422)               |                           |
| Clear                                      | 110 (26.1)                      | 21.9–30.3                 |
| Unclear                                    | 40 (9.5)                        | 6.7–12.3                  |
| Not applicable                             | 272 (64.5)                      | 59.9–69.0 <sup>d</sup>    |

<sup>a</sup>Asymptotic 95% CIs of the percent response rate calculated

<sup>b</sup>Number of patients with  $\geq 1$  imaging abnormality from any baseline assessment

<sup>c</sup>Judgments could not be made for some assessments due to inconsistent imaging modalities before and at the end/discontinuation of treatment; for assessments of whether fungal lesions shrank by >25%, 99.9% were uncertain

<sup>d</sup>Patients could not be reassessed because they were not re-examined or because inconsistent mycological examination methods were applied before and after treatment

CI, confidence interval; FAS, full analysis set

**Supplementary Table 4** Effectiveness results (PPS [ $n=1457$ ])

---

Comprehensive assessment of treatment,  $n$  (%); 95% CI

|                        |                       |
|------------------------|-----------------------|
| Complete response      | 302 (20.7); 18.7–22.8 |
| Partial response       | 705 (48.4); 45.8–51.0 |
| Stable response        | 233 (16.0); 14.1–17.9 |
| Progression of disease | 152 (10.4); 8.9–12.0  |
| Death                  | 65 (4.5); 3.4–5.5     |

---

Asymptotic 95% CIs of the percent response rate calculated  
*CI*, confidence interval; *PPS*, per-protocol set

**Supplementary Table 5** AEs reported in > 1% of patients treated with micafungin (SAS [*n* = 2555])

|                                                      | <b>Number of patients (%)</b> | <b>Number of events</b> |
|------------------------------------------------------|-------------------------------|-------------------------|
| Events by System Organ Class and Preferred term      | 925 (36.2)                    | 1989                    |
| Investigations                                       | 250 (9.8)                     | 395                     |
| Platelet count decreased                             | 35 (1.4)                      | 35                      |
| Blood albumin decreased                              | 26 (1.0)                      | 26                      |
| Gastrointestinal disorders                           | 248 (9.7)                     | 322                     |
| Diarrhea                                             | 56 (2.2)                      | 57                      |
| Vomiting                                             | 47 (1.8)                      | 47                      |
| Abdominal pain                                       | 30 (1.2)                      | 30                      |
| Abdominal distension                                 | 30 (1.2)                      | 30                      |
| Respiratory, thoracic and mediastinal disease        | 218 (8.5)                     | 282                     |
| Dyspnea                                              | 58 (2.3)                      | 61                      |
| Respiratory failure                                  | 43 (1.7)                      | 43                      |
| Chest discomfort                                     | 27 (1.1)                      | 27                      |
| Cough                                                | 26 (1.0)                      | 26                      |
| General disorders and administration site conditions | 193 (7.6)                     | 218                     |
| Fever                                                | 51 (2.0)                      | 51                      |
| Multi-organ failure                                  | 38 (1.5)                      | 38                      |
| Edema peripheral                                     | 33 (1.3)                      | 34                      |
| Fatigue                                              | 30 (1.2)                      | 30                      |
| Infections and infestations                          | 99 (3.9)                      | 118                     |
| Pulmonary infection                                  | 55 (2.2)                      | 55                      |
| Septic shock                                         | 32 (1.3)                      | 32                      |
| Nervous system disorders                             | 86 (3.4)                      | 95                      |

|                                        |          |    |
|----------------------------------------|----------|----|
| Cardiac disorders                      | 80 (3.1) | 91 |
| Skin and subcutaneous tissue disorders | 77 (3.0) | 80 |
| Rash                                   | 34 (1.3) | 34 |
| Blood and lymphatic system disorders   | 61 (2.4) | 65 |
| Anemia                                 | 37 (1.5) | 37 |
| Hepatobiliary disorders                | 56 (2.2) | 58 |
| Hepatic function abnormal              | 43 (1.7) | 43 |

---

*AEs*, adverse events; *SAS*, safety analysis set

**Supplementary Fig. 1** Overall success rates (proportion of patients with complete or partial response) at the end of treatment according to: diagnostic certainty (**a**); the organism causing the infection (**b**); type of disease (**c**); treatment duration (**d**) and the daily dose (**e**) in the PPS<sup>a</sup>

<sup>a</sup>Patients receiving micafungin for < 1 week were excluded from the PPS. *P*-values indicate significant differences between treatment groups (providing there is also a clear difference in the proportion of patients with a complete or partial response); error bars represent asymptotic 95% confidence intervals

PPS, per-protocol set

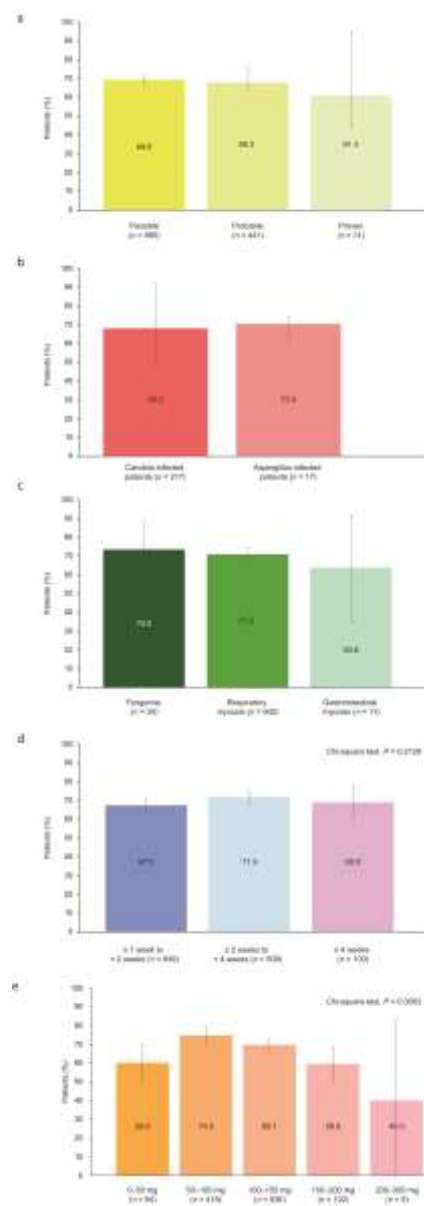

Supplement: 12325_2018_762_MOESM1_ESM.pdf [file 12325_2018_762_MOESM1_ESM.pdf]
